# Supplementary material for: Molecular Phylogenetic Relationships and Unveiling Novel Genetic Diversity among Slow and Pygmy Lorises, including Resurrection of Xanthonycticebus intermedius
Source: MDPI journal article supplement (doi:10.3390/genes14030643), 2023-03-03
Supplement: s1 [file s1]

**Table S1.** Sample details of additional *Xanthonycticebus* specimens used in the study for the morphological analysis and taxonomic revision, including GenBank accession numbers of additional mitochondrial sequences.

| Species name          | Common name          | Specimen No. | Map ID   | Provider | Provenance                    | Sex | HB  | SL    | ML    | PL    | PB    | BO    | SB    | BC    | RH    | BZ    | Reference         | Genbank Acc. no.(s)              |
|-----------------------|----------------------|--------------|----------|----------|-------------------------------|-----|-----|-------|-------|-------|-------|-------|-------|-------|-------|-------|-------------------|----------------------------------|
| <i>X. intermedius</i> | Northern pygmy loris | FMNH32499    | n/a      | FMNH     | Lai Chau, Vietnam             | M   | 248 | 50.7  | 33.29 | 19.34 | 17.2  | 33.93 | 22.64 | 10.51 | 14.02 | 35.11 | This study        | n/a                              |
| <i>X. intermedius</i> | Northern pygmy loris | FMNH38911    | n/a      | FMNH     | Thy-Ba, near Hanoi, Vietnam   | F   | 214 | 50.46 | 30.33 | 19.46 | 16.39 | 32.87 | 21.98 | 9.72  | 14.04 | 32.46 | This study        | n/a                              |
| <i>X. intermedius</i> | Northern pygmy loris | FMNH38912    | n/a      | FMNH     | Lung Linh, Ha Giang, Vietnam  | M   | 227 | 50.85 | 31.29 | 21.65 | 18.12 | 33.02 | 21.66 | 10.73 | 13.55 | 34.58 | This study        | n/a                              |
| <i>X. intermedius</i> | Northern pygmy loris | HZM069       | NL_pygmy | HZM      | Hoà Binh, Vietnam             |     | 230 | n/a   | Pozzi et al. 2015 | KP410626                         |
| <i>X. intermedius</i> | Northern pygmy loris | IZM56        | n/a      | IZM      | Thanh tuong, Na Hang, Vietnam | F   | n/a | 49.81 | 32.54 | 19.89 | 17.47 | 33.83 | 21.75 | 10.49 | 14.01 | 34.7  | This study        | n/a                              |
| <i>X. intermedius</i> | Northern pygmy loris | L10          | L10      | Hải      | Hòa Bình, Vietnam             |     | n/a | n/a   | n/a   | n/a   | n/a   | n/a   | n/a   | n/a   | n/a   | n/a   | This study        | OQ518128<br>OQ555508<br>OQ555595 |
| <i>X. intermedius</i> | Northern pygmy loris | L11          | L11      | Hải      | Hòa Bình, Vietnam             |     | n/a | n/a   | n/a   | n/a   | n/a   | n/a   | n/a   | n/a   | n/a   | n/a   | This study        | OQ518129<br>OQ555509<br>OQ555596 |
| <i>X. intermedius</i> | Northern pygmy loris | L12          | L12      | Hải      | Hòa Bình, Vietnam             |     | n/a | n/a   | n/a   | n/a   | n/a   | n/a   | n/a   | n/a   | n/a   | n/a   | This study        | OQ518130<br>OQ555510<br>OQ555597 |
| <i>X. intermedius</i> | Northern pygmy loris | L13          | L13      | Hải      | Hòa Bình, Vietnam             |     | n/a | n/a   | n/a   | n/a   | n/a   | n/a   | n/a   | n/a   | n/a   | n/a   | This study        | OQ518131<br>OQ555511<br>OQ555598 |
| <i>X. intermedius</i> | Northern pygmy loris | L14          | L14      | Hải      | Ba Vì, Vietnam                |     | n/a | n/a   | n/a   | n/a   | n/a   | n/a   | n/a   | n/a   | n/a   | n/a   | This study        | OQ518132<br>OQ555512<br>OQ555572 |
| <i>X. intermedius</i> | Northern pygmy loris | L15          | L15      | Hải      | Ba Vì, Vietnam                |     | n/a | n/a   | n/a   | n/a   | n/a   | n/a   | n/a   | n/a   | n/a   | n/a   | This study        | OQ518133<br>OQ555513<br>OQ555573 |
| <i>X. intermedius</i> | Northern pygmy loris | L19          | L19      | Hải      | Lào Cai, Vietnam              |     | n/a | n/a   | n/a   | n/a   | n/a   | n/a   | n/a   | n/a   | n/a   | n/a   | This study        | OQ518134<br>OQ555517<br>OQ555576 |
| <i>X. intermedius</i> | Northern pygmy loris | L20          | L20      | Hải      | Lào Cai, Vietnam              |     | n/a | n/a   | n/a   | n/a   | n/a   | n/a   | n/a   | n/a   | n/a   | n/a   | This study        | OQ518135<br>OQ555518<br>OQ555577 |
| <i>X. intermedius</i> | Northern pygmy loris | L23          | L23      | M. Le    | Sa Pa, Vietnam                |     | n/a | n/a   | n/a   | n/a   | n/a   | n/a   | n/a   | n/a   | n/a   | n/a   | This study        | OQ518136<br>OQ555521<br>OQ555578 |
| <i>X. intermedius</i> | Northern pygmy loris | L24          | L24      | M. Le    | Sa Pa, Vietnam                |     | n/a | n/a   | n/a   | n/a   | n/a   | n/a   | n/a   | n/a   | n/a   | n/a   | This study        | OQ518137<br>OQ555522<br>OQ555579 |
| <i>X. intermedius</i> | Northern pygmy loris | L27          | L27      | M. Le    | Quan Hóa - Thanh Hóa, Vietnam |     | n/a | n/a   | n/a   | n/a   | n/a   | n/a   | n/a   | n/a   | n/a   | n/a   | This study        | OQ518138<br>OQ555525<br>OQ555582 |
| <i>X. intermedius</i> | Northern pygmy loris | L28          | L28      | M. Le    | Quan Hóa - Thanh Hóa, Vietnam |     | n/a | n/a   | n/a   | n/a   | n/a   | n/a   | n/a   | n/a   | n/a   | n/a   | This study        | OQ518139<br>OQ555526             |

|                       |                      |               |     |               |                                    |   |     |       |       |       |       |       |       |       |       |       |            |                       |
|-----------------------|----------------------|---------------|-----|---------------|------------------------------------|---|-----|-------|-------|-------|-------|-------|-------|-------|-------|-------|------------|-----------------------|
|                       |                      |               |     |               |                                    |   |     |       |       |       |       |       |       |       |       |       |            | OQ555583              |
| <i>X. intermedius</i> | Northern pygmy loris | L35           | L35 | M. Le         | Xuân Liên - Thanh Hóa, Vietnam     |   | n/a | n/a   | n/a   | n/a   | n/a   | n/a   | n/a   | n/a   | n/a   | n/a   | This study | OQ555533<br>OQ555589  |
| <i>X. intermedius</i> | Northern pygmy loris | L39           | L39 | M. Le         | Thanh Hóa, Vietnam                 |   | n/a | n/a   | n/a   | n/a   | n/a   | n/a   | n/a   | n/a   | n/a   | n/a   | This study | OQ555534<br>OQ555590  |
| <i>X. intermedius</i> | Northern pygmy loris | L9            | L9  | Hải           | Hòa Bình, Vietnam                  |   | n/a | n/a   | n/a   | n/a   | n/a   | n/a   | n/a   | n/a   | n/a   | n/a   | This study | OQ555507<br>OQ555594  |
| <i>X. intermedius</i> | Northern pygmy loris | HZM71         | N18 | HZM           | Ba Vi, Hà Tây, Vietnam             | F | n/a | 44.08 | 27.04 | n/a   | 16.51 | 28.68 | n/a   | 9.28  | 9.32  | 27.95 | This study | n/a                   |
| <i>X. intermedius</i> | Northern pygmy loris | HZM970        | n/a | HZM           | Lục Yên, Yên Bái, Vietnam          | M | n/a | 48.95 | 30.11 | 19.45 | 17.39 | 31.34 | 20.63 | 10.32 | 12.02 | 31.34 | This study | n/a                   |
| <i>X. intermedius</i> | Northern pygmy loris | MNHN1892-1531 | n/a | H. d'Orléans  | Cho-Bo, Vietnam                    |   | n/a | 50.97 | 30.38 | 17.96 | 17.14 | 35.77 | 23.51 | 10.92 | 13.79 | 35.72 | This study | n/a                   |
| <i>X. intermedius</i> | Northern pygmy loris | MNHN1892-1532 | n/a | H. d'Orléans  | Cho-Bo, Vietnam                    |   | n/a | 49.26 | 32.04 | 17.54 | 16.39 | 34.2  | 22.8  | 10.74 | 14.23 | 35.32 | This study | n/a                   |
| <i>X. pygmaeus</i>    | Southern pygmy loris | MNHN1929-454  | n/a | J. Delacour   | Kon Tum, Vietnam                   |   | n/a | 50.93 | 32.61 | 17.61 | 17.43 | 32.36 | 23.77 | 10.34 | 11.87 | 33.97 | This study | n/a                   |
| <i>X. pygmaeus</i>    | Southern pygmy loris | 443/X84       | 443 | DLM           | Lâm Đồng, Vietnam                  |   | n/a | 54.73 | 35.31 | n/a   | 18.4  | 36.42 | n/a   | 11.47 | 15.71 | 37.34 | This study | n/a                   |
| <i>X. pygmaeus</i>    | Southern pygmy loris | 492/MSx85     | 492 | DLM           | Lâm Đồng, Vietnam                  | M | n/a | n/a   | 34.72 | 20.5  | 17.56 | 34.02 | 20.33 | 10.73 | 13.56 | 33.1  | This study | n/a                   |
| <i>X. pygmaeus</i>    | Southern pygmy loris | 520/MSx87     | 520 | DLM           | Lâm Đồng, Vietnam                  |   | n/a | 54.91 | 34.33 | 20.7  | 18.99 | 37.95 | 25.69 | 11.47 | 14.87 | 37.86 | This study | n/a                   |
| <i>X. pygmaeus</i>    | Southern pygmy loris | FMNH33504     | n/a | FMNH          | near Saigon, Vietnam               |   | n/a | 51.52 | n/a   | 20.39 | 18.52 | 34.39 | 22.08 | 11.96 | 15.29 | 35.71 | This study | n/a                   |
| <i>X. pygmaeus</i>    | Southern pygmy loris | FMNH46824     | n/a | FMNH          | Buon Ma Thuot, Dak Lak, Vietnam    | M | 268 | 51.81 | 33.7  | 20.73 | 18.25 | 32.92 | 24.28 | 10.73 | 14.58 | 36.51 | This study | n/a                   |
| <i>X. pygmaeus</i>    | Southern pygmy loris | FMNH46825     | 125 | FMNH          | Buon Ma Thuot, Dak Lak, Vietnam    | F | 270 | 54.64 | 33.64 | 20.82 | 18.26 | 35.7  | 23.39 | 10.87 | 16.54 | 37.97 | This study | OQ555583              |
| <i>X. pygmaeus</i>    | Southern pygmy loris | FMNH46826     | n/a | FMNH          | Buon Ma Thuot, Dak Lak, Vietnam    | M | 263 | 53.32 | 35.38 | 22.91 | 17.45 | 35.99 | 22.9  | 10.84 | 14.84 | 38.5  | This study | n/a                   |
| <i>X. pygmaeus</i>    | Southern pygmy loris | FMNH46827     | n/a | FMNH          | Buon Ma Thuot, Dak Lak, Vietnam    | M | 265 | 55.56 | 34.76 | 22.77 | 17.72 | 35.79 | 22.34 | 11.04 | 15.97 | 37.5  | This study | n/a                   |
| <i>X. pygmaeus</i>    | Southern pygmy loris | FMNH46828     | 123 | FMNH          | Buon Ma Thuot, Dak Lak, Vietnam    |   | 256 | n/a   | This study | OQ555583              |
| <i>X. pygmaeus</i>    | Southern pygmy loris | FMNH46829     | n/a | FMNH          | Buon Ma Thuot, Dak Lak, Vietnam    | F | 221 | 55.48 | 34.6  | 21.95 | 19.69 | 34.49 | 23.21 | 11.42 | 15.12 | 38.1  | This study | n/a                   |
| <i>X. pygmaeus</i>    | Southern pygmy loris | HZM1011       | N20 | Vũ Ngọc Thành | Cánh Rơi, Mã Đà, Đồng Nai, Vietnam |   | n/a | n/a   | n/a   | n/a   | n/a   | n/a   | n/a   | n/a   | n/a   | n/a   | This study | OQ5555473<br>OQ555600 |
| <i>X. pygmaeus</i>    | Southern pygmy loris | IZM1879       | n/a | Dinh Van C.   | An Khê, Gia Lai, Vietnam           |   | n/a | 52.09 | 32.74 | 20.02 | 18.51 | na    | 24.06 | 10.62 | 14.96 | na    | This study | n/a                   |
| <i>X. pygmaeus</i>    | Southern pygmy loris | L1            | L1  | M. Blair      | Lâm Đồng, Vietnam                  |   | n/a | n/a   | n/a   | n/a   | n/a   | n/a   | n/a   | n/a   | n/a   | n/a   | This study | OQ555499<br>OQ555569  |

|                    |                      |        |     |           |                                   |   |     |       |       |       |       |       |       |       |       |       |            |                                  |
|--------------------|----------------------|--------|-----|-----------|-----------------------------------|---|-----|-------|-------|-------|-------|-------|-------|-------|-------|-------|------------|----------------------------------|
| <i>X. pygmaeus</i> | Southern pygmy loris | L16    | L16 | Hải       | Nha Trang, Vietnam                |   | n/a | n/a   | n/a   | n/a   | n/a   | n/a   | n/a   | n/a   | n/a   | n/a   | This study | QO518116<br>QO555514<br>QO555599 |
| <i>X. pygmaeus</i> | Southern pygmy loris | L17    | L17 | Hải       | Nha Trang, Vietnam                |   | n/a | n/a   | n/a   | n/a   | n/a   | n/a   | n/a   | n/a   | n/a   | n/a   | This study | QO518117<br>QO555515<br>QO555574 |
| <i>X. pygmaeus</i> | Southern pygmy loris | L18    | L18 | Hải       | Nha Trang, Vietnam                |   | n/a | n/a   | n/a   | n/a   | n/a   | n/a   | n/a   | n/a   | n/a   | n/a   | This study | QO518118<br>QO555516<br>QO555575 |
| <i>X. pygmaeus</i> | Southern pygmy loris | L25    | L25 | M. Kenyon | Đào Tiên, Cat Tien, Vietnam       |   | n/a | n/a   | n/a   | n/a   | n/a   | n/a   | n/a   | n/a   | n/a   | n/a   | This study | QO518119<br>QO555523<br>QO555580 |
| <i>X. pygmaeus</i> | Southern pygmy loris | L26    | L26 | M. Kenyon | Đào Tiên, Cat Tien, Vietnam       |   | n/a | n/a   | n/a   | n/a   | n/a   | n/a   | n/a   | n/a   | n/a   | n/a   | This study | QO518120<br>QO555524<br>QO555581 |
| <i>X. pygmaeus</i> | Southern pygmy loris | L29    | L29 | M. Kenyon | Đào Tiên, Cat Tien, Vietnam       |   | n/a | n/a   | n/a   | n/a   | n/a   | n/a   | n/a   | n/a   | n/a   | n/a   | This study | QO518121<br>QO555527<br>QO555584 |
| <i>X. pygmaeus</i> | Southern pygmy loris | L3     | L3  | M. Blair  | Lâm Đồng, Vietnam                 |   | n/a | n/a   | n/a   | n/a   | n/a   | n/a   | n/a   | n/a   | n/a   | n/a   | This study | QO518110<br>QO555501<br>QO555570 |
| <i>X. pygmaeus</i> | Southern pygmy loris | L30    | L30 | M. Kenyon | Đào Tiên, Cat Tien, Vietnam       |   | n/a | n/a   | n/a   | n/a   | n/a   | n/a   | n/a   | n/a   | n/a   | n/a   | This study | QO518122<br>QO555528<br>QO555585 |
| <i>X. pygmaeus</i> | Southern pygmy loris | L31    | L31 | M. Kenyon | Đào Tiên, Cat Tien, Vietnam       |   | n/a | n/a   | n/a   | n/a   | n/a   | n/a   | n/a   | n/a   | n/a   | n/a   | This study | QO518123<br>QO555529<br>QO555586 |
| <i>X. pygmaeus</i> | Southern pygmy loris | L32    | L32 | M. Kenyon | Đào Tiên, Cat Tien, Vietnam       |   | n/a | n/a   | n/a   | n/a   | n/a   | n/a   | n/a   | n/a   | n/a   | n/a   | This study | QO518124<br>QO555530<br>QO555587 |
| <i>X. pygmaeus</i> | Southern pygmy loris | L33    | L33 | M. Kenyon | Đào Tiên, Cat Tien, Vietnam       |   | n/a | n/a   | n/a   | n/a   | n/a   | n/a   | n/a   | n/a   | n/a   | n/a   | This study | QO518125<br>QO555531<br>QO555588 |
| <i>X. pygmaeus</i> | Southern pygmy loris | L4     | L4  | M. Blair  | Lâm Đồng, Vietnam                 |   | n/a | n/a   | n/a   | n/a   | n/a   | n/a   | n/a   | n/a   | n/a   | n/a   | This study | QO518111<br>QO555502<br>QO555591 |
| <i>X. pygmaeus</i> | Southern pygmy loris | L5     | L5  | M. Blair  | Lâm Đồng, Vietnam                 |   | n/a | n/a   | n/a   | n/a   | n/a   | n/a   | n/a   | n/a   | n/a   | n/a   | This study | QO518112<br>QO555503<br>QO555592 |
| <i>X. pygmaeus</i> | Southern pygmy loris | L7     | L7  | M. Blair  | Lâm Đồng, Vietnam                 |   | n/a | n/a   | n/a   | n/a   | n/a   | n/a   | n/a   | n/a   | n/a   | n/a   | This study | QO518114<br>QO555505<br>QO555571 |
| <i>X. pygmaeus</i> | Southern pygmy loris | L8     | L8  | M. Blair  | Lâm Đồng, Vietnam                 |   | n/a | n/a   | n/a   | n/a   | n/a   | n/a   | n/a   | n/a   | n/a   | n/a   | This study | QO518115<br>QO555505<br>QO555593 |
| <i>X. pygmaeus</i> | Southern pygmy loris | HZM758 | n/a | HZM       | Ro Côi, Sa Thay, Kon Tum, Vietnam | F | n/a | 47.65 | 30.91 | 19.03 | 17.11 | 31.46 | 20.86 | 10.61 | 12.51 | 31.44 | This study | n/a                              |
| <i>X. pygmaeus</i> | Southern pygmy loris | HZM759 | N12 | HZM       | Ro Côi, Sa Thay, Kon Tum, Vietnam | M | 260 | 50.75 | 31.88 | 19.44 | 17.05 | 34.96 | 22.56 | 11.21 | 13.54 | 36    | This study | n/a                              |

|                    |                      |            |     |      |                                                                   |   |     |       |       |       |       |       |       |       |       |       |            |                                  |
|--------------------|----------------------|------------|-----|------|-------------------------------------------------------------------|---|-----|-------|-------|-------|-------|-------|-------|-------|-------|-------|------------|----------------------------------|
| <i>X. pygmaeus</i> | Southern pygmy loris | HZM760     | n/a | HZM  | Ro Coi, Sa Thay, Kon Tum, Vietnam                                 | F | 280 | 48.05 | 30.49 | 18.59 | 17.5  | 32.88 | 20.39 | 10.24 | 12.1  | 33.04 | This study | n/a                              |
| <i>X. pygmaeus</i> | Southern pygmy loris | HZM873     | n/a | HZM  | Ro Coi, Sa Thay, Kon Tum, Vietnam                                 | F | 320 | 49.4  | 31.53 | n/a   | 19.32 | 34.36 | n/a   | 11.07 | 13.5  | 34.75 | This study | n/a                              |
| <i>X. pygmaeus</i> | Southern pygmy loris | HZM874     | 874 | HZM  | Tay Nguyen, Vietnam                                               |   | n/a | 50.53 | 31.42 | 19.19 | 17.56 | 33.55 | n/a   | 10.5  | 13.5  | 34.2  | This study | n/a                              |
| <i>X. pygmaeus</i> | Southern pygmy loris | NMNH256913 | 75  | NMNH | Dong Nai, Bien Hoa Trang Bom, Vietnam                             |   | n/a | n/a   | 31.91 | 19.43 | 16.16 | 33.57 | n/a   | 9.16  | 13.77 | 35.93 | This study | OQ518104                         |
| <i>X. pygmaeus</i> | Southern pygmy loris | NMNH258234 | 74  | NMNH | Lam Dong, Bao Loc Township, Vietnam                               |   | n/a | n/a   | 33.26 | 18.32 | 17.96 | 35.45 | 25.22 | 9.54  | 14.57 | 36.54 | This study | OQ518103                         |
| <i>X. pygmaeus</i> | Southern pygmy loris | NMNH357750 | 76  | NMNH | Binh Dinh an Khe, Vietnam                                         |   | n/a | n/a   | n/a   | n/a   | n/a   | n/a   | n/a   | n/a   | n/a   | n/a   | This study | OQ518105<br>OQ555495<br>OQ555568 |
| <i>X. sp++</i>     | pygmy loris          | AMNH87282  | 64  | AMNH | Plateau Bolovens, Laos                                            | M | n/a | 52.58 | 32.81 | 20.05 | 17.18 | 34.25 | 23.23 | 11.1  | 13.12 | 35.56 | This study | n/a                              |
| <i>X. sp++</i>     | pygmy loris          | FMNH37986  | 137 | FMNH | Thateng, Plateau Bolovens, Balikhambay Prov, 90 km NE Pakse, Laos | M | 255 | 50.09 | 29.85 | 16.85 | 17.5  | 33.44 | 21.75 | 8.66  | 12.94 | 34.94 | This study | n/a                              |

Map ID refers to ID on Figure 1 map or on Figure S5 tree (if shown).

Species and common names are following the taxonomic revision presented here.

+A skull measurement was included in the original description (55) but the skull is no longer available at HZM for remeasurement to include for comparison here.

++We excluded samples from Plateau Bolovens, Laos from any comparisons, as species genetic ID could not be confirmed for them, but they were included in tests for sexual dimorphism.

#### Abbreviations:

- FMNH: Field Museum of Natural History, Chicago, USA
- HZM: Hanoi Zoological Museum, Hanoi, Vietnam
- NMNH: National Museum of Natural History, Washington, D.C., USA
- DLM: Da Lat Biological Museum, Da Lat, Vietnam
- IZM: IEBR Zoological Museum, Hanoi, Vietnam
- AMNH: American Museum of Natural History, New York, NY, USA
- MNHN: Muséum National d'Histoire Naturelle, Paris, France
- HB: Total Head Body Length
- SL: Greatest Skull Length
- ML: Mandible Length
- PL: Palate Length
- PB: Palate Breadth

- BO: Biorbital Breadth
- SB: Staphylion to basion length
- BC: Bicanine Breadth
- RH: Ramus Height
- BZ: Bizygomatic breadth
