# Supplementary material for: Molecular Phylogenetic Relationships and Unveiling Novel Genetic Diversity among Slow and Pygmy Lorises, including Resurrection of Xanthonycticebus intermedius
Source: MDPI journal article supplement (doi:10.3390/genes14030643), 2023-03-03
Supplement: s1 [file s1]

**Table S2.** Results of PCA comparing cranial measurements of *Xanthonycticebus* specimens (variable loadings, percentage variance, and standard deviation), with measurement definitions.

| <b>Variable</b>                   | <b>PC1</b> | <b>PC2</b> | <b>PC3</b> | <b>PC4</b> | <b>Measurement Definition</b>                                       |
|-----------------------------------|------------|------------|------------|------------|---------------------------------------------------------------------|
| Greatest Skull Length             | 0.39128482 | -0.0028046 | 0.01567475 | -0.0841814 | Rhinion to opisthocranium                                           |
| Mandible length                   | 0.35420213 | -0.1021822 | 0.12082556 | 0.02885784 | Gonion to infradentale                                              |
| Palate length                     | 0.34627005 | -0.6091664 | -0.0952445 | 0.14378557 | Prosthion to staphylion                                             |
| Palate breath (widest)            | 0.31572752 | -0.0583725 | -0.3487849 | -0.8260013 | between upper outer alveolar M1 junctions                           |
| Biorbital Breath                  | 0.3030862  | 0.26352539 | 0.16258894 | 0.19386051 | Maximum horizontal distance between outer margins of orbital rims   |
| Staphylion to basion length       | 0.32991372 | 0.67398122 | -0.1211484 | 0.06187643 | Staphylion to basion                                                |
| Bicanine breath                   | 0.3118557  | -0.114975  | -0.5874765 | 0.49717466 | Maximum breadth of muzzle across canine alveoli.                    |
| Ramus Height                      | 0.26258232 | -0.2270488 | 0.62200739 | -0.0194368 | Maximum height of the mandibular ramus                              |
| Bizygomatic breath                | 0.36734517 | 0.16307415 | 0.28513003 | 0.0125408  | Greatest distance between the outer margins of the zygomatic arches |
| Standard Deviation                | 2.2202     | 0.965      | 0.84038    | 0.67857    |                                                                     |
| Percentage of Variance            | 0.6356     | 0.1201     | 0.09106    | 0.05937    |                                                                     |
| Cumulative Proportion of Variance | 0.6356     | 0.7557     | 0.84676    | 0.90613    |                                                                     |
