# Supplementary material for: Molecular Phylogenetic Relationships and Unveiling Novel Genetic Diversity among Slow and Pygmy Lorises, including Resurrection of Xanthonycticebus intermedius
Source: MDPI journal article supplement (doi:10.3390/genes14030643), 2023-03-03
Supplement: s1 [file s1]

**Table S3a. Primers Used In this Study**

| <b>Locus</b>  | <b>Primer</b> | <b>Sequence</b>                     | <b>Reference</b> |
|---------------|---------------|-------------------------------------|------------------|
| <b>CO1</b>    | 5288F         | CACCTCGAGGCCTGGTAAAAAGGG            | This Study       |
|               | 5509R         | GGCTGACCTAGCTCTGCTCG                | This Study       |
|               | 5477F         | AAGTTTGCTAATCCGAGCAGAG              | This Study       |
|               | 5704R         | GCCGGCTCCGGCCTCAACTA                | This Study       |
|               | 5605F         | GGGGCTTCGGGAAGTATTA                 | This Study       |
|               | 5841R         | CCCCTGCTAAGTGAAGGGAGA               | This Study       |
|               | 5821F         | TCTCCCTTCACTTAGCAGGGG               | This Study       |
|               | 6052R         | CCTCCTGCCGGATCAAAGAAT               | This Study       |
|               | 6002F         | GCTGCTAACAGACCGTAACCT               | This Study       |
|               | 6242R         | CCACACAATGAAGCCCAGGA                | This Study       |
| <b>Cytb</b>   | L14724        | CGAAGCTTGATATGAAAAACCATCGTTG        | 1                |
|               | H15149        | AAACTGCAGCCCCCTCAGAATGATATTTGTCCTCA | 1                |
|               | L15162        | GCAAGCTTCTACCATGAGGACAAATATC        | 1                |
|               | H15915        | AACTGCAGTCATCTCCGGTTTACAAGAC        | 1                |
|               | 14764F        | TCGTCGCTGCTCTAGTTGTG                | This Study       |
|               | 15042R        | GGATGGCGTAGGCGAATAGA                | This Study       |
|               | 14947F        | TCCTAGGAGACCCCGACAAC                | This Study       |
|               | 15124R        | TGGAGGTGAGGGATTAGGGC                | This Study       |
|               | 14979F        | AACCCCTTAGTCAACCCTCC                | This Study       |
|               | 15222R        | GCCCTCCGATTCAGGTTAGG                | This Study       |
|               | 15065F        | AGGAGGAGTTTTGGCACTAGC               | This Study       |
|               | 15350R        | AGGGCTATTTCTTCATTTGAGTAGT           | This Study       |
|               | 15299F        | ACCACTAACAAGCCTATTTGAAAAC           | This Study       |
|               | 15528R        | GCAGGTGCGGTTGTTGAGTA                | This Study       |
| <b>D-loop</b> | 15381F        | AAACCGAAAACGGAGCACCC                | This Study       |
|               | 15648R        | ATGGGGACAGGGTCTTAATGT               | This Study       |
|               | cytb9FPygmy   | AGCCACACTCACACGATTCT                | This Study       |
|               | cytb9RPygmy   | AGGGTCCCCTAAGAGGTCAG                | This Study       |
|               | cytb10FPygmy  | AGTTTTATTCTCCCCTGACCTCT             | This Study       |
|               | 15628F        | ACATTAAGACCCTGTCCCCA                | This Study       |
| <b>ND-4</b>   | 10169F        | GTATCCAACACCTACGGCAT                | This Study       |
|               | 10336F        | CACCTACTCCACCAACCTAT                | This Study       |
|               | 10405R        | GGGGTAGATAGGGTGTCGGA                | This Study       |
|               | 10514F        | TCACCTTACAAACACTCTTAGTT             | This Study       |
|               | 10566R        | TAAGATCAATTCGGAGGCTGT               | This Study       |
|               | 10710F        | CTACACCCAAAACCTCGC                  | This Study       |
|               | 10742R        | AGATTTAGTGACCCTGCGAG                | This Study       |
|               | 10926R        | TAGGAGGATAGCTGCTAAAACT              | This Study       |
|               | ND4-2FPygmy   | CTATCCCCCTCCTTGTTCTCAC              | This Study       |
|               | ND4-2RPygmy   | TGTCTGGTTTCCTCATCGGG                | This Study       |
|               | ND4-3FPygmy   | CACCCGATGAGGAAACCAGA                | This Study       |

|             |                       |            |
|-------------|-----------------------|------------|
| ND4-3RPygmy | TGGGGAGTCATAAGTGTGTGC | This Study |
| ND4-4FPygmy | GCACACACTTATGACTCCCCA | This Study |
| ND4-4RPygmy | TTGTCGTAGGCAGATGGAGC  | This Study |

**Table S3b. Primer Pairs and Annealing Temperatures Used in this Study**

| Locus         | Genus                   | Sample Type: | Primer Pair               | Annealing Temp. (C) |
|---------------|-------------------------|--------------|---------------------------|---------------------|
| <b>CO1</b>    | Both                    | Modern       | 5288F-5704R               | 50                  |
|               | Both                    | Historical   | 5288F - 5509R             | 50                  |
|               | Both                    | Historical   | 5477F - 5704R             | 50                  |
|               | Both                    | Historical   | 5605F-5841R               | 50                  |
|               | Both                    | Historical   | 5821F-6052R               | 50                  |
|               | Both                    | Historical   | 6002F-6242R               | 50                  |
| <b>cyt-b</b>  | Both                    | Modern       | L14724-H15149             | 50                  |
|               | Both                    | Modern       | L15162-H15915             | 50                  |
|               | Both                    | Modern       | L15996-16498              | 50                  |
|               | Both                    | Historical   | 14764F-15042R             | 56                  |
|               | Both                    | Historical   | 14947F-15124R             | 56                  |
|               | Both                    | Historical   | 14979F-15222R             | 56                  |
|               | Both                    | Historical   | 15065F-15350R             | 50                  |
|               | Both                    | Historical   | 15299F-15528R             | 55                  |
| <b>D-loop</b> | <i>Nycticebus</i>       | Historical   | 15381F-15648R             | 50                  |
|               | <i>Xanthonycticebus</i> | Historical   | cytb9F-pygmy-cytb9R-pygmy | 50                  |
|               | <i>Nycticebus</i>       | Historical   | 15628F-H15915             | 50                  |
|               | <i>Xanthonycticebus</i> | Historical   | cytb10Fpygmy-H15915       | 50                  |
| <b>ND4</b>    | Both                    | Modern       | 10169F-10566R             | 50                  |
|               | Both                    | Modern       | 10336F-10926R             | 50                  |
|               | Both                    | Historical   | 10169F-10405R             | 50                  |
|               | <i>Nycticebus</i>       | Historical   | 10336F-10566R             | 50                  |
|               | <i>Nycticebus</i>       | Historical   | 10514F-10752R             | 50                  |
|               | <i>Nycticebus</i>       | Historical   | 10710F-10926R             | 50                  |
|               | <i>Xanthonycticebus</i> | Historical   | nd4-2Fpygmy-nd4-2Rpygmy   | 50                  |
|               | <i>Xanthonycticebus</i> | Historical   | nd4-3Fpygmy-nd4-3Rpygmy   | 50                  |
|               | <i>Xanthonycticebus</i> | Historical   | nd4-4Fpygmy-nd4-4Rpygmy   | 50                  |

## References

1. Irwin, D.M.; Kocher, T.D.; Wilson, A.C. Evolution of the cytochrome b gene of mammals. *Journal of Molecular Evolution*. 1991, 32, 128-144.
